# Supplementary material
Source: publisher figshare collection journal article supplement (https://acs.figshare.com/ndownloader/files/10358907)
Supplement: Supplementary file 1 [file 10358907]

## Sheet: DPP4_Dataset
Supporting Information
DPP4 dataset
SMILES	Name	Obs F%	Ext_test	CLfit	CLloc	CLp(mL/min/kg)	Pred Fa%	Pred F%
C(F)(F)(F)c1nnc2n1CCN(C3CC(C(c4c(F)cc(F)c(F)c4)CC3)N)C2	Biftu_BMCL_02	100	1	0.01	2.05	7.6	98.97	82.91
C(=O)(N1C(c2c(n(c(C(F)(F)F)n2)C)CC1)C)CC(Cc3c(F)cc(F)c(F)c3)N	Chen_BMCL_64	40	0	9.46411	10.9	81	99.09	36.68
C(=O)(N1C(C(F)(F)F)c2c(n(cn2)C)CC1)CC(Cc3c(F)cc(F)c(F)c3)N	Chen_BMCL_67b	16	0	29.36	31.5	93	98.4	15.08
C(=O)(N1C(c2c(n(c(C(F)(F)F)n2)C)CC1)Cc3ccccc3)CC(Cc4c(F)cc(F)c(F)c4)N	Chen_BMCL_71b	16	0	139.15	93.3	64	99.82	22.12
Fc1c(F)cc(c(F)c1)C2C(N)CN(c3nc4c(nc3)nccn4)CC2	Cox_BMCL_32	45	0	18.1447	22.1	62	99.81	40.19
Fc1c(F)cc(c(F)c1)C2C(N)CN(C3=Nc4nncn4C=C3)CC2	Cox_BMCL_35	19	0	29.6403	41.2	54	98.58	14.45
O=C1N=C2N(N=C(N3CC(C(c4c(F)cc(F)c(F)c4)CC3)N)C=C2)C=C1	Cox_BMCL_39	12	1	34.6908	0.0227	35	95.32	94.81
O=C1N2C(=NC(=C1)C)C=CC(=N2)N3CC(C(c4c(F)cc(F)c(F)c4)CC3)N	Cox_BMCL_40	74	0	2.17475	2.43	18	98.89	71.88
Fc1c(F)cc(c(F)c1)C2C(N)CN(C3=Nn4c(nnc4C)C=C3)CC2	Cox_BMCL_43	100	0	0.01	0.0135	12	99.31	99.06
C(=O)(N1Cc2nnc(C(F)(F)F)n2CC1)CC(Cc3c(F)cc(F)c(F)c3)N	Kim_BMCL_01	76	1	1.09315	0.555	60	95.08	84.28
C(=O)(N1Cc2nnc(C(F)(F)F)n2CC1)CC(Cc3c(Cl)cc(Cl)cc3)N	Kim_BMCL_37	36	0	11.6862	25.5	98	93.54	20.84
C(=O)(N1Cc2nnc(C(F)(F)F)n2CC1)CC(Cc3c(F)ccc(Cl)c3)N	Kim_BMCL_39	43	0	4.06952	7.48	99	87.65	30.06
C(=O)(N1Cc2nnc(C(F)(F)F)n2CC1)CC(Cc3c(F)cc(Cl)c(F)c3)N	Kim_BMCL_40	54	0	6.03698	4.74	58	97.65	59.73
C(=O)(N1Cc2nnc(C(F)(F)F)n2CC1)CC(Cc3c(Cl)cc(F)c(F)c3)N	Kim_BMCL_41	47	0	6.86683	5.81	78	96.5	51.02
C(=O)(N1Cc2nnc(n2CC1)CC)CC(Cc3c(F)cc(F)c(F)c3)N	Kim_BMCL_47	2	0	92.797	57.1	70	93.8	3.204
C(=O)(N1Cc2nnc(n2CC1)C3CC3)CC(Cc4c(F)cc(F)c(F)c4)N	Kim_BMCL_48	3	0	79.6549	75.6	68	94.69	3.153
C(=O)(N1Cc2nnc(n2CC1)C(F)F)CC(Cc3c(F)cc(F)c(F)c3)N	Kim_BMCL_49	39	0	3.9532	4.17	66	94	37.76
C(=O)(N1Cc2nnc(C(F)(F)F)n2CC1)CC(Cc3c(F)cc(F)c(F)c3)N	Kim_JMC_05_01	76	1	1.09315	0.555	60	95.08	84.28
C(=O)(N1Cc2nnc(n2CC1)CC)CC(Cc3cc(F)c(F)cc3)N	Kim_JMC_05_23	2	0	62.2197	73.5	45	85.62	1.69
C(=O)(N1Cc2nnc(C(F)(F)F)n2CC1)CC(Cc3cc(F)c(F)cc3)N	Kim_JMC_05_24	44	0	2.52499	3.26	51	83.7	38.48
C(=O)(N1Cc2nnc(C(F)(F)F)n2CC1)CC(Cc3c(F)ccc(F)c3)N	Kim_JMC_05_25	51	0	1.59076	1.15	43	82.38	56.75
C(=O)(N1Cc2nncn2CC1)CC(Cc3c(F)cc(F)c(F)c3)N	Kim_JMC_05_26	3	0	54.9584	28.1	40	92.69	5.681
C(=O)(N1Cc2nnc(C(C(F)(F)F)(F)F)n2CC1)CC(Cc3c(F)cc(F)c(F)c3)N	Kim_JMC_05_27	61	0	6.02722	2.72	58	97.27	76.69
C(=O)(N1Cc2nnc(n2CC1)CC(F)(F)F)CC(Cc3c(F)ccc(F)c3)N	Kim_JMC_05_28	1	0	128.985	29	109	76.9	4.216
C(=O)(N1Cc2nnc(C(F)(F)F)n2C(C1)C)CC(Cc3c(F)cc(F)c(F)c3)N	Kim_JMC_08_12b	35	0	8.76472	3.38	154	96.75	57.57
C(=O)(N1C(c2nnc(C(F)(F)F)n2C(C1)C)C)CC(Cc3c(F)cc(F)c(F)c3)N	Kim_JMC_08_16c	45	0	7.82337	14.7	85	98.52	30.46
C(=O)(N1C(c2nnc(C(F)(F)F)n2CC1)C)CC(Cc3c(F)cc(F)c(F)c3)N	Kim_JMC_08_34b	57	0	3.96137	3.13	54	97.62	62.45
C(N(C)C)(=O)CC1c2nnc(C(F)(F)F)n2CCN1C(=O)CC(Cc3c(F)cc(F)c(F)c3)N	Kim_JMC_08_41b	9	0	32.5599	43	87	91.28	6.975
C(=O)(N1C(c2nnc(C(F)(F)F)n2CC1)Cc3c(F)cccc3)CC(Cc4c(F)cc(F)c(F)c4)N	Kim_JMC_08_45b	26	0	63.1039	94.5	74	99.72	19.01
C(=O)(N1C(c2nnc(C(F)(F)F)n2CC1)Cc3ccc(F)cc3)CC(Cc4c(F)cc(F)c(F)c4)N	Kim_JMC_08_46b	76	1	5.92396	91.8	29	99.63	17.12
C(=O)(N1C(c2nnc(C(F)(F)F)n2CC1)C(c3ccc(F)cc3)O)CC(Cc4c(F)cc(F)c(F)c4)N	Kim_JMC_08_47b	8	0	119.712	102	63	96.21	9.255
C(=O)(N1C(c2nnc(C(F)(F)F)n2CC1)Cc3cc(C(F)(F)F)cc(C(F)(F)F)c3)CC(Cc4c(F)cc(F)c(F)c4)N	Kim_JMC_08_48b	19	0	656.363	105	50	99.98	59.45
C(=O)(N1C(c2nnc(C(F)(F)F)n2CC1)Cc3ncccc3)CC(Cc4c(F)cc(F)c(F)c4)N	Kim_JMC_08_49b	9	0	65.036	80.2	94	95.96	7.429
C(=O)(N1Cc2nc(C(F)(F)F)nn2CC1)CC(Cc3c(F)cc(F)c(F)c3)N	Kowalchick_BMCL_25	100	0	0.01	0.0207	60	96.09	95.61
C(=O)(N1C(c2nc(C(F)(F)F)nn2CC1)C)CC(Cc3c(F)cc(F)c(F)c3)N	Kowalchick_BMCL_29b	74	1	2.01293	0.0932	68	98.04	96.53
C(=O)(N1C(c2nc(C(F)(F)F)nn2CC1)Cc3ccc(F)cc3)CC(Cc4c(F)cc(F)c(F)c4)N	Kowalchick_BMCL_30b	32	0	44.062	43.4	76	99.69	32.33
C(=O)(N1C(c2nc(C(F)(F)F)nn2CC1)Cn3cncc3)CC(Cc4c(F)cc(F)c(F)c4)N	Kowalchick_BMCL_35	7.1	0	67.7429	69.5	97	92.48	6.929
C(=O)(N1C(c2nc(C(F)(F)F)nn2CC1)Cn3nccc3)CC(Cc4c(F)cc(F)c(F)c4)N	Kowalchick_BMCL_36	62	0	4.17859	6.27	142	96.18	52.63
C(=O)(N1C(c2nc(C(F)(F)F)nn2CC1)Cn3ncnc3)CC(Cc4c(F)cc(F)c(F)c4)N	Kowalchick_BMCL_37	13	0	35.3606	20.4	129	91.14	20.38
C(=O)(N1C(C(=O)N2C(CCC2)CC1)C)CC(Cc3c(F)cc(F)c(F)c3)N	Liang_BMCL_12	21	0	5.42794	7.24	152	88.77	16.68
C(=O)(N1C(C(=O)NCC(C1)C)C)CC(Cc2c(F)cc(F)c(F)c2)N	Liang_BMCL_14a	49	0	0.933009	0.809	92.8	82.99	51.46
C(=O)(N1C(C(=O)NC(CC1)C)C)CC(Cc2c(F)cc(F)c(F)c2)N	Liang_BMCL_15a	64	0	0.357399	0.534	87	80.8	57.5
C(=O)(N1C(C(=O)NC(CC1)C)Cc2ncccc2)CC(Cc3c(F)cc(F)c(F)c3)N	Liang_BMCL_15f	8.1	0	12.3991	33.3	97	75.58	3.195
C(=O)(N1C(C(=O)NCCC1)CC(F)(F)F)CC(Cc2c(F)cc(F)c(F)c2)N	Liang_BMCL_2d	36	0	2.31493	1.59	94	88.19	44.04
C(=O)(N1C(C(=O)N(CC)CCC1)C)CC(Cc2c(F)ccc(F)c2)N	Liang_BMCL_9a	7.7	0	11.5573	15.1	152	82.55	5.979
C(=O)(N1C(C(=O)N(C2CC2)CCC1)C)CC(Cc3c(F)ccc(F)c3)N	Liang_BMCL_9d	19	0	4.80431	16.2	135	85.56	6.638
C(=O)(N1C(C(=O)N(CCC1)C)C)CC(Cc2c(F)cc(F)c(F)c2)N	Liang_BMCL_9e	29	0	2.54481	1.61	113	87.93	38.31
C(=O)(N1C(C(=O)N(CC(F)(F)F)CCC1)C)CC(Cc2c(F)cc(F)c(F)c2)N	Liang_BMCL_9h	23	0	5.40741	7.46	82	93.56	17.86
C(=O)(N1C(C(=O)N(C2CC2)CCC1)C)CC(Cc3c(F)cc(F)c(F)c3)N	Liang_BMCL_9i	45	1	1.66552	10.3	51	89.87	12.5
HSD1 dataset
SMILES	Name	Obs F%	Ext_test	CLhep	CLfit	CLloc	CLp	Pred F%	Pred Fa%
C(=O)(c1c(SCC)nc(N2CC3C(C(=O)O)C3C2)cc1)NC4C5CC6CC4CC(C5)C6	Scott_MCC_10	100	0	9	0.053	1.99	8	85.7	99.74
C(=O)(c1c(SCCC)nc(N2CC3C(C(=O)O)C3C2)cc1)NC4C5CC6CC4CC(C5)C6	Scott_MCC_09	100	1	9	0.051	3.74	6	79.82	99.87
C(=O)(c1c(SCCC)n(-c2cc(C(=O)O)ccc2)nc1)NC3CCCCC3	Scott_JMC-2-7	100	0	17	0.068	1.45	17	95.94	99.84
C(=O)(c1c(SCCC)nc(N2C[C@H](CC(=O)O)CCC2)cc1)NC3CCCCC3	Scott_JMC-1-11i	100	0	2	0.048	2.66	9	82.67	99.84
C(=O)(c1c(OCCC)nc(N2C[C@H](CC(=O)O)CCC2)cc1)NC3CCCCC3	Scott_JMC-1-13a	100	0	9	0.042	0.222	9	97.34	99.87
C(=O)(c1c(C2(CC2)C)n(-c3ccc(C(=O)O)cc3)nc1)NC4C5CC6CC4CC(C5)C6	Scott_JMC-2-26	100	0	11	0.054	0.27	19	99.29	99.95
C(=O)(c1c(nc(N2CCOCC2)cc1)C3CC3)NC4C5CC6(O)CC4CC(C6)C5	Scott_BMCL-20	100	0	2	0.023	4.85	21	62.6	99.94
C(=O)(c1c(nc(nc1)C)CC(C)C)NC2C3CC4(O)CC2CC(C4)C3	Scott_BMCL-13	100	1		0.01	1.66	13	79.27	99.94
C(=O)(c1c(nc(nc1)N2CCOCC2)C3CC3)NC4C5CC6(O)CC4CC(C6)C5	Scott_BMCL-25	100	0	2	0.036	0.514	8.1	90.99	99.6
C(=O)(c1c(SCCC)n(nc1)C2CCC(C(=O)O)CC2)NC3CCCCC3	Scott_JMC-2-5	100	0	7.5	0.045	0.24	2.5	97.08	99.76
C(=O)(c1c(C(F)(F)F)n(-c2ccc(C(=O)O)cc2)nc1)NC3C4CC5CC3CC(C4)C5	Scott_JMC-2-25	100	0	3	0.045	0.0907	3.8	99.6	99.77
C(=O)(c1c(n(-c2ccc(C(=O)O)cc2)nc1)C3CCCC3)NC4C5CC6CC4CC(C5)C6	Scott_JMC-2-24	100	0	2	0.046	0.395	0.6	99.11	99.97
C(=O)(c1c(n(-c2ccc(C(=O)O)cc2)nc1)C3CCC3)NC4C5CC6CC4CC(C5)C6	Scott_JMC-2-23	100	0	3	0.061	0.143	1.3	99.58	99.95
C(=O)(c1c(C(C)(C)C)nc(nc1)N2CCOCC2)NC3C4CC5(O)CC3CC(C5)C4	Scott_BMCL-24	100	0	2	0.01	0.117	4.8	98.45	99.79
C(=O)(c1c(SCCC)nc(NC2CCC(C(=O)O)CC2)cc1)NC3CCCCC3	Scott_JMC-1-11a	100	0	2	0.049	5.94	6	70.03	99.79
C(=O)(c1c(n(-c2ccc(C(=O)O)cc2)nc1)CC)NC3C4CC5CC3CC(C4)C5	Scott_JMC-2-20	100	0	2	0.07	0.381	7.3	98.69	99.85
C(=O)(c1c(n(-c2ccc(C(=O)O)cc2)nc1)C)NC3C4CC5CC3CC(C4)C5	Scott_JMC-2-19	100	0	3	0.078	0.242	8	98.87	99.68
C(=O)(c1c(SCCC)nc(N2C(C(=O)O)CCCC2)cc1)NC3CCCCC3	Scott_JMC-1-11e	100	0	10	0.071	1.5	12	78.65	91.2
C(=O)(c1c(SCCC)nc(N2CCC(C(=O)O)CC2)cc1)NC3CCCCC3	Scott_JMC-1-11g	100	1	2	0.049	3.1	8	76.42	99.66
C(=O)(c1c(nc(nc1)C)CCCC)NC2C3CC4(O)CC2CC(C4)C3	Scott_BMCL-11	98	0	3	0.14	1.9	9.5	79.27	99.96
C(=O)(c1c(SCCC)nc(N2CC(CC(=O)O)CC2)cc1)NC3CCCCC3	Scott_MCC_06	96	0	2	0.45	2.52	2	81.82	99.78
C(=O)(c1c(C(C)(C)C)n(-c2ccc(C(=O)O)cc2)nc1)NC3C4CC5CC3CC(C4)C5	Scott_JMC-2-27	95	0	2	2.321	0.344	0.733333	99.2	99.97
C(=O)(OC)C1C2C1CN(c3nc(SC4CCCC4)c(C(=O)NC5C6CC7(OC(F)F)CC5CC(C7)C6)cc3)C2	Scott_MCC_14	94	0	7	5.556	14.2	9	85.98	100
C(=O)(c1c(SCCC)nc(N2CCC(CC(=O)O)CC2)cc1)NC3CCCCC3	Scott_JMC-1-11j	90	0	6	1.095	5.53	4	64.93	99.5
C(=O)(c1c(SC)nc(N2CC3C(C(=O)O)C3C2)cc1)NC4C5CC6CC4CC(C5)C6	Scott_MCC_11	86	0	6	1.521	1.84	6	83.62	99.47
C(C(C1CN(c2nc(SCCC)c(C(=O)NC3CCCCC3)cc2)CCC1)(C)C)(=O)O	Scott_MCC_05	84	0	22	3.635	0.318	9	98.33	99.97
C(=O)(c1c(C(C)(C)C)nc(nc1)C)NC2C3CC4(O)CC2CC(C4)C3	Scott_BMCL-12	84	0	2	1.37	0.193	4.4	97.26	99.89
C(=O)(c1c(SCCC)nc(nc1)N2CCOCC2)NC3C4CC5(O)CC3CC(C5)C4	Scott_BMCL-10	83	0	3	2.207	3.43	11	75.89	99.9
C(=O)(c1c(SC2CCCCC2)n(-c3ccc(C(=O)O)cc3)nc1)NC4C5CC6CC4CC(C5)C6	Scott_JMC-2-17	82	0	9.4	13.002	27.8	3.6	68.06	99.99
C(=O)(c1c(SCCC)nccc1)NC2CCC(C(=O)O)CC2	Scott_JMC-1-7h	81	0	2	1.336	5.68	2.5	51.09	98.81
C(=O)(c1c(SCCC)nc(NCC2CCC(C(=O)O)CC2)cc1)NC3CCCCC3	Scott_JMC-1-11b	81	0	8	4.803	6.04	8	77.23	99.96
C(=O)(c1c(SCCC)nc(N2CC3C(C(=O)O)C3C2)cc1)NC4CCCCC4	Scott_MCC_07	80	0	2	2.806	1.11	2	90.77	99.56
C(=O)(c1c(SCCC)nc(N2C[C@@H](CC(=O)O)CCC2)cc1)NC3CCCCC3	Scott_JMC-1-11h	79	1	8	3.379	2.66	1	82.67	99.84
C(=O)(c1c(nc(nc1)C)C2CCCC2)NC3C4CC5(O)CC3CC(C5)C4	Scott_BMCL-18	77	0	7	2.146	2.02	6.6	78.05	99.96
C(=O)(c1c(nc(cc1)C)C2CC2)NC3C4CC5(O)CC3CC(C5)C4	Scott_BMCL-19	75	0	2	2.346	14.3	8.6	32.99	99.99
C(=O)(c1c(SCCC)nc(nc1)C)NC2C3CC4(O)CC2CC(C4)C3	Scott_BMCL-4	74	0	11	3.143	7.65	14	53.92	99.95
C(=O)(c1c(nc(N2C[C@H](CC(=O)O)CCC2)cc1)NCCC)NC3CCCCC3	Scott_JMC-1-13b	72	0	7	3.242	1.22	4	86.88	99.27
C(=O)(c1c(SCCC)n(-c2ccc(C(=O)O)cc2)nc1)NC3CCCCC3	Scott_JMC-2-6	72	0	3	13.442	7.05	4.5	82.99	99.78
C(=O)(c1c(SCCC)nc(N2CC(C3(C(=O)O)CC3)CCC2)cc1)NC4CCCCC4	Scott_MCC_04	71	0	15	6.975	0.555	8	96.79	99.93
C(=O)(c1c(nc(nc1)N2CCOCC2)C3CCCC3)NC4C5CC6(O)CC4CC(C6)C5	Scott_BMCL-27	67	1	3	4.331	2.24	7.6	79.67	99.9
C(=O)(c1c(SCCC)nc(N2C[C@@H](CC(=O)O)CCC2)cc1)NC3CCCCC3	Scott_MCC_01	66	0	2	6.567	2.66	9	82.67	99.84
C(=O)(c1c(SCC)n(-c2ccc(C(=O)O)cc2)nc1)NC3C4CC5CC3CC(C4)C5	Scott_JMC-2-14	65	0	6	20.508	12	3	76.02	99.92
C(=O)(c1c(SC)n(-c2ccc(C(=O)O)cc2)nc1)NC3C4CC5CC3CC(C4)C5	Scott_JMC-2-15	64	0	2	18.217	11.5	11	73.76	99.83
C(=O)(c1c(SCCC)nc(N2CCOCC2)cc1)NC3C4CC5(O)CC3CC(C5)C4	Scott_BMCL-9	64	0	6	8.964	9.67	17	62.24	99.98
C(=O)(c1c(SCCC)nc(cc1)C)NC2C3CC4(O)CC2CC(C4)C3	Scott_BMCL-3	63	1	44	9.043	132	13	10.45	100
C(=O)(c1c(SC2CCCC2)nc(N3CC4C(C(=O)O)C4C3)cc1)NC5C6CC7(O)CC5CC(C7)C6	Scott_MCC_13	57	0	4	7.453	6.59	43	59.91	98.33
C(=O)(c1c(SC2CCCC2)n(-c3ccc(C(=O)O)cc3)nc1)NC4C5CC6CC4CC(C5)C6	Scott_JMC-2-16	57	0	14	39.996	14.9	3.3	78.06	99.99
C(=O)(c1c(nc(N2C[C@H](CC(=O)O)CCC2)cc1)CCCC)NC3CCCCC3	Scott_JMC-1-14	57	0	2	5.017	6.69	4	50.06	97.57
C(=O)(c1c(SCCC)n(-c2ccc(C(=O)O)cc2)nc1)NC3C4CC5(OC)CC3CC(C5)C4	Scott_JMC-2-11	54	0	2	30.923	12.9	13	73.75	99.91
C(=O)(c1c(n(-c2ccc(C(=O)O)cc2)nc1)C(C)C)NC3C4CC5CC3CC(C4)C5	Scott_JMC-2-21	53	0	2	33.295	0.739	2.2	98	99.93
C(=O)(c1c(SCCC)nc(N2CC(C(=O)O)CC2)cc1)NC3CCCCC3	Scott_MCC_08	52	0	3	9.837	3.3	3	76.2	99.6
C(=O)(c1c(n(-c2ccc(C(=O)O)cc2)nc1)C3CC3)NC4C5CC6CC4CC(C5)C6	Scott_JMC-2-22	51	1	15	32.974	0.0576	14	99.7	99.87
C(=O)(c1c(nc(nc1)C)CC2CCCC2)NC3C4CC5(O)CC3CC(C5)C4	Scott_BMCL-15	50	0	7	11.382	3.34	17	77.3	99.98
C(=O)(c1c(SCCC)n(nc1)C2CCC(C(=O)O)CC2)NC3CCCCC3	Scott_JMC-2-4	49	1	58	9.09	0.24	43	97.08	99.76
C(=O)(c1c(SCCC)nc(N2CC3C(C(=O)O)C3C2)cc1)NC4C5CC6(O)CC4CC(C6)C5	Scott_MCC_12	48	0	2	7.929	19	42	28.13	97.1
C(=O)(c1c(SCCC)nc(N2CC(C(=O)O)CCC2)cc1)NC3CCCCC3	Scott_JMC-1-11f	45	0	6	14.449	4.79	4	71.07	99.72
C(=O)(c1c(nc(nc1)N2CCOCC2)C3CCC3)NC4C5CC6(O)CC4CC(C6)C5	Scott_BMCL-26	45		2	8.329	1.06	11	86.41	99.81
C(=O)(c1c(SCCC)n(-c2ccc(C(=O)O)cc2)nc1)NC3C4CC5CC3CC(C4)C5	Scott_JMC-2-9	45	1	4.7	53.214	26.4	2	62.25	99.96
C(=O)(c1c(SCCC)n(-c2ccc(C(=O)O)cc2)nc1)NC3C4CC5(OC(F)F)CC3CC(C5)C4	Scott_JMC-2-12	40	0	18	62.386	28.4	9.4	59.41	99.93
C(=O)(c1c(N(CCC)C)nc(N2C[C@H](CC(=O)O)CCC2)cc1)NC3CCCCC3	Scott_JMC-1-13c	39	0	12	13.16	5.92	15	58.66	99.8
C(=O)(c1c(OCCC)nc(nc1)N2CCOCC2)NC3C4CC5(O)CC3CC(C5)C4	Scott_BMCL-30	36	0	9	12.885	1.43	14	83.49	99.96
C(=O)(c1c(nc(nc1)N2CCOCC2)C3CCCCC3)NC4C5CC6(O)CC4CC(C6)C5	Scott_BMCL-28	31	0	6	25.424	3.35	5.8	77.29	99.95
C(=O)(c1c(OCCC)nc(N2CCOCC2)cc1)NC3C4CC5(O)CC3CC(C5)C4	Scott_BMCL-21	31	0	15	22.129	6.87	33	59.13	99.99
C(N(C1CCCCC1)C)(=O)c2c(SCCC)n(-c3ccc(C(=O)O)cc3)nc2	Scott_JMC-2-8	26	0	26	113.03	37.6	8.1	51.36	99.97
C(=O)(c1c(SCCC)nc(NC)cc1)NC2C3CC4(O)CC2CC(C4)C3	Scott_BMCL-5	25	0	34	43.556	39.5	36	26.88	99.98
C(=O)(c1c(SCCC)nc(N(C)C)cc1)NC2C3CC4(O)CC2CC(C4)C3	Scott_BMCL-7	24	0	73	71.307	53	30	29.82	100
C(=O)(c1c(SCCC)nc(N2CC(Cc3nnn[nH]3)CCC2)cc1)NC4CCCCC4	Scott_MCC_03	21	0	9	89.573	86	31	21.68	99.58
C(=O)(c1c(SCCC)nccc1)NC2[C@@H]3CC4(O)CC(C3)C[C@H]2C4	Scott_JMC-1-7d	11	0	49	97.009	236	110	4.835	99.99
C(=O)(c1c(SCCC)n(-c2ccc(C(=O)O)cc2)nc1)NC3C4CC5(O)CC3CC(C5)C4	Scott_JMC-2-10	10	0	2	212.297	155	20	13.2	98.98
C(=O)(c1c(SCCC)n(-c2ccc(C(=O)O)cc2)nc1)NC3C4CC5(S(=O)(=O)C)CC3CC(C5)C4	Scott_JMC-2-13	7	0	2.6	240.975	18.1	83	49.43	97.35
C(=O)(c1c(SCCC)nc(N2CC(CC(=O)NS(=O)(=O)C)CCC2)cc1)NC3CCCCC3	Scott_MCC_02	5	0	38	223.64	230	35	4.869	99.55
C(=O)(c1c(SC2CCCC2)nc(N3CC4C(C(=O)O)C4C3)cc1)N5CC(c6cnccc6)CC5	Scott_MCC_15	3	0	20	300.429	63.3	18	12.73	95.37
C(N(C1[C@@H]2CC3(O)CC(C2)C[C@H]1C3)C)(=O)c4c(SCCC)nccc4	Scott_JMC-1-7e	1	0	140	1404.32	472	24	2.918	100
C(=O)(c1c(SCCC)nccc1)NC2CCC(F)(F)CC2	Scott_JMC-1-7b	1	0	130	1103.9	388	30	2.794	100
C(N(C1CCCCC1)C)(=O)c2c(SCCC)nccc2	Scott_JMC-1-7a	1	0	350	2344.72	958	48	2.413	100
C(=O)(c1c(SCCC)nccc1)NC2CCCCC2	Scott_JMC-1-4a	1	0	100	1549.43	573	30	2.659	100
C(=O)(c1c(SCCC)nccc1)NC2CCCCC2	Scott_JMC-1-4	1	1	284	1549.43	573	41	2.659	100
C(N(C1CCOCC1)C)(=O)c2c(SCCC)nccc2	Scott_JMC-1-7c	1	0	90	559.573	32.8	46	14.7	99.99
C(=O)(c1c(SCCC)nccc1)N2C(c3ccncc3)CCC2	Scott_JMC-1-7g	1	0	120	1130.09	476	39	2.342	100
C(=O)(c1c(SCCC)n(nc1)C)NC2CCCCC2	Scott_JMC-2-3	1	0	120	906.064	153	21	5.644	100
C(=O)(c1c(SCCC)ncnc1)NC2C3CC4(O)CC2CC(C4)C3	Scott_BMCL-2	1	0	87	712.75	14.2	100	33.63	99.91
PIM dataset
Name	Obs F%	Ext_test	CLrlm	CLfit	CLloc	CLp	Pred F%	Pred Fa%
Cmpd1	64	0	448.421	0.953556	1.62	3.42	46.92	72.61
Cmpd2	13	0	10.9734	84.4099	61.8	3.9	16.95	100
Cmpd3	76	0	28.0853	1.53357	2.22	1.32	65.67	91.87
Cmpd4	44	0	142.243	2.66594	7.33	0.78	20.67	75.5
Cmpd5	70	1	20.4872	2.28049	2.55	1.68	64.43	92.08
Cmpd6	33	0	28.0907	9.64666	7.65	2.16	35.61	89.49
Cmpd7	20	0	107.56	91.275	59.8	2.7	27.62	99.99
Cmpd8	6	1	906.691	179.425	71.8	2.7	13.73	99.77
Cmpd9	10	0	396.412	121.74	88.4	3.06	13.25	99.81
Cmpd10	9.5	0	411.745	187.492	81.3	2.88	19.49	99.97
Cmpd11	17	0	187.109	136.157	76.5	3.36	26.71	99.99
Cmpd12	20	0	89.6524	57.1316	61.1	1.44	18.83	99.1
Cmpd13	26	0	21.2302	27.2339	90	5.58	9.546	99.01
Cmpd14	22	0	30.0581	49.3308	63.4	3.54	17.94	99.56
Cmpd15	3	0	65.554	209.27	90.4	2.1	6.507	96.23
Cmpd16	12	0	251.987	111.832	110	3.36	12.16	99.86
Cmpd17	40	0	50.4619	21.3301	35.3	1.08	28.59	99.36
Cmpd18	36	1	46.8558	20.6884	33.4	1.92	25.61	98.51
Cmpd19	31	0	91.1899	31.2141	52.1	1.62	21.03	98.68
Cmpd20	20	0	150.259	59.7734	48.4	4.02	23.47	99.36
Cmpd21	30	0	28.4483	11.7482	6.92	1.38	36.84	80.54
Cmpd22	49	0	34.5742	14.7442	27	1.08	34.32	99.62
Cmpd23	25	0	60.1055	13.7295	13.5	2.16	23.61	88.42
Cmpd24	22	0	33.5456	66.034	66.3	2.1	21.86	99.64
Cmpd25	22	1	17.0437	16.3201	3.46	1.14	51.59	87.28
Cmpd26	54	0	17.0437	3.68244	3.46	0.42	51.59	87.28
Cmpd27	19	1	26.7991	15.4423	9.45	3.18	25.3	85.99
Cmpd28	4	0	21.2522	77.3802	24.5	1.38	9.935	72.47
Cmpd29	26	0	46.2082	12.5882	6.35	1.68	37.3	85.78
Cmpd30	12	0	31.8453	19.5443	11.7	1.86	16.41	78.58
Cmpd31	38	0	19.277	6.55925	3.67	1.62	47.64	86.9
Cmpd32	32	0	8	5.04206	6.58	1.08	23.58	74.88
Cmpd33	82	0	28.4763	0.642924	3.67	1.08	47.64	86.9
Cmpd34	1	0	8	133.691	60.9	3.12	1.741	46.78
Cmpd35	28	0	26.8978	12.5916	4.55	0.6	48.17	90.24
Cmpd36	2	0	9.2636	88.8942	89.4	2.94	1.558	46.08
Cmpd37	36	0	14.381	8.72813	6.72	0.96	39.07	86.01
Cmpd38	7	0	8	34.0566	31.3	1.92	6.471	66.14
Cmpd39	1	0	8	216.962	102	5.88	1.743	53.39
Cmpd40	2.3	0	11.083	53.5798	99.5	4.92	0.997	42.69
Cmpd41	37	0	13.7073	8.19723	12.4	1.02	26.07	83.88
Cmpd42	35	0	37.6272	11.3873	4.78	2.16	51.98	88.95
Cmpd43	47	0	34.6276	7.26799	4.05	0.66	57.61	90.17
Cmpd44	67	0	21.1969	1.8521	2.38	1.02	57.64	85.99
Cmpd45	17	0	72.9337	18.2425	12.4	1.86	20.11	75.2
Cmpd46	43	0	37.4609	7.68542	13.9	0.96	27.98	86.61
Cmpd47	27	0	24.089	9.30634	6.97	2.94	29.58	78.72
Cmpd48	2	0	22.9262	119.694	54.6	1.86	3.529	58.04
Cmpd49	54	1	16.306	4.3069	2.93	2.52	59.38	90.04
Cmpd50	54	0	16.306	4.3069	2.93	1.86	59.38	90.04
Cmpd51	53	1	20.4887	8.2496	2.87	0.54	73.87	95.79
Cmpd52	47	0	29.3331	4.59727	5.86	2.1	38.16	84.25
Cmpd53	18	0	158.779	5.14606	4.59	1.68	15.22	51.89
Cmpd54	35	0	25.5499	9.23464	4.7	2.52	47.31	87.65
Cmpd55	37	0	68.4254	5.93301	5.98	1.32	33.58	81.54
Cmpd56	35	0	196.45	4.92565	8.06	1.38	22.66	76.43
Cmpd57	91	0	24.5532	0.509486	2.72	0.78	70.34	93.04
Cmpd58	28	0	24.4635	11.4121	4.35	1.8	45.02	83.29
Cmpd59	26	0	31.7902	16.897	5.74	2.58	47.63	90.8
Cmpd60	64	0	16.762	2.10455	7.74	3.36	33.33	84.54
Cmpd61	66	0	25.14	4.30193	3.85	0.9	67.07	96.88
Cmpd62	70	1	50.3147	0.94129	5.75	2.4	32.04	78.16
Cmpd63	19	0	47.8255	7.12095	4.58	0.48	21.75	67.64
